# Supplementary material for: Novel luminescent hybrids prepared by incorporating a rare earth ternary complex into CdS QD loaded zeolite Y crystals through coordination reaction
Source: Royal Society of Chemistry journal article supplement (doi:10.1039/c3ce42479k), 2014-01-01
Supplement: c3ce42479k1.pdf [file c3ce42479k1.pdf]

## Supporting information

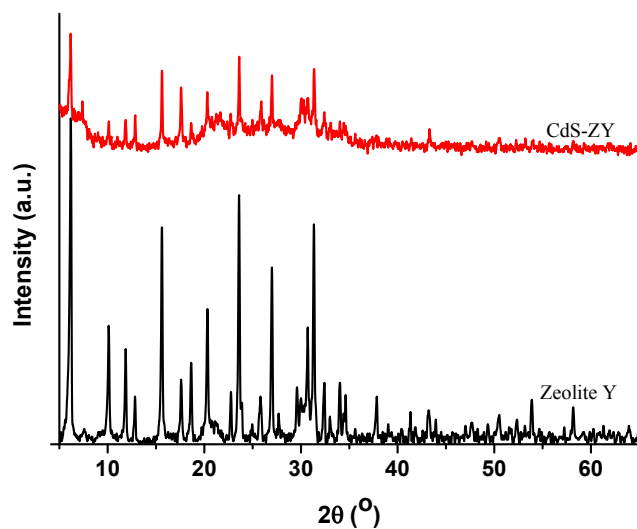

Figure S1 XRD patterns of zeolite Y and CdS-ZY.

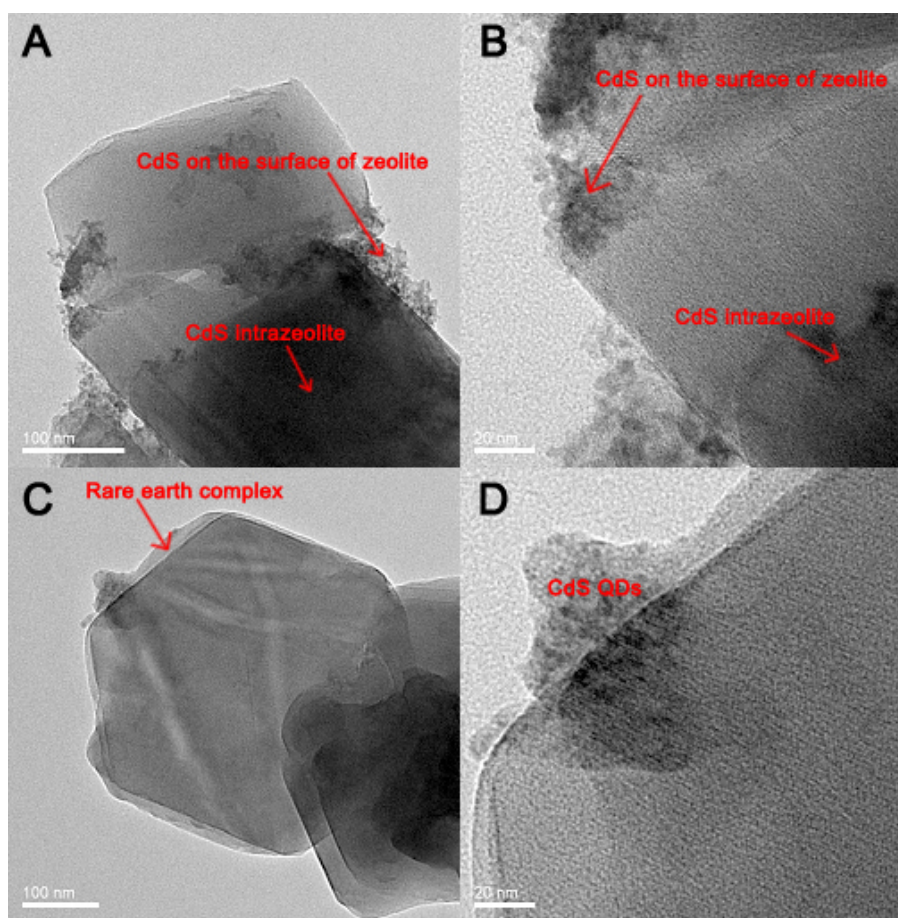

Figure S2 TEM images of CdS-ZY (A, B) and Eu(phen)(*o*-MBA)<sub>3</sub>-CdS-ZY (C, D).

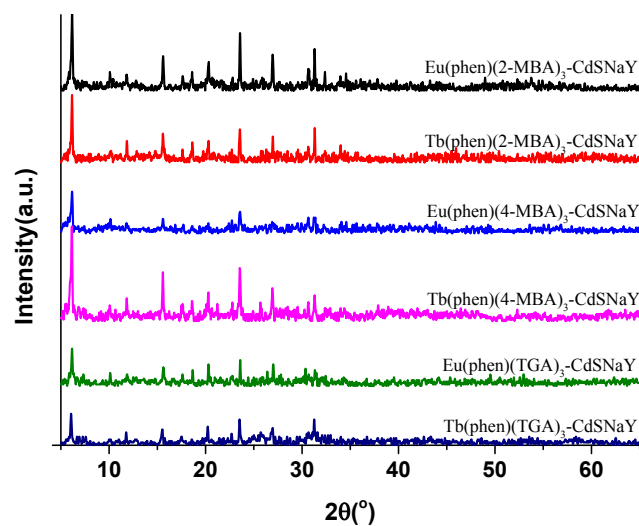

**Figure S3** XRD patterns of europium or terbium complexes functionalized CdS-ZY.

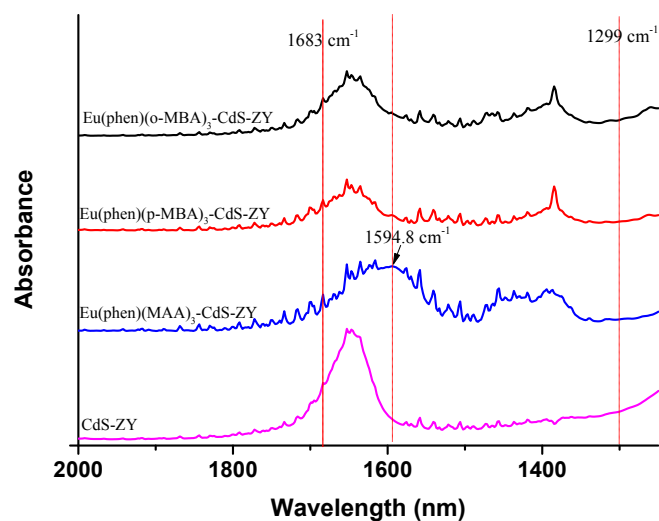

**Figure S4** FTIR spectra of europium complexes functionalized CdS-ZY with three different mercaptan ranged from 1250~2000  $\text{cm}^{-1}$ .

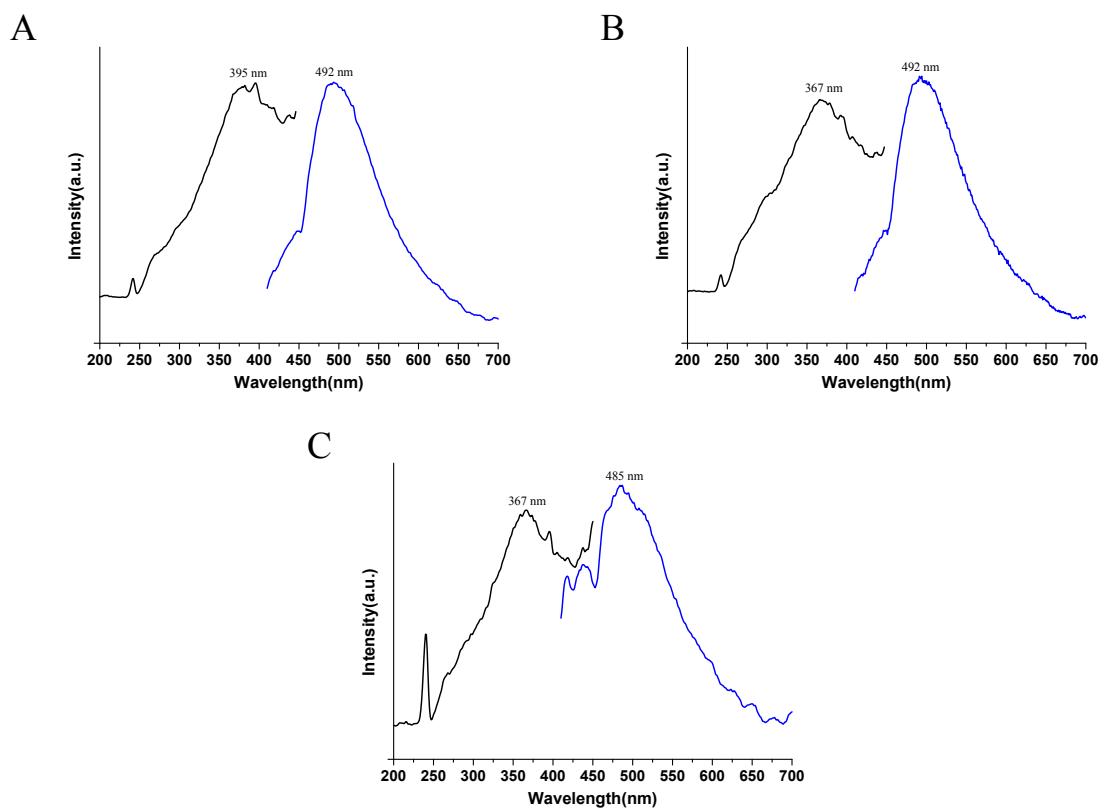

**Figure S5** Excitation and emission spectrum of (*o*-MBA)-CdS-ZY, (*p*-MBA)-CdS-ZY (MAA)-CdS-ZY. (A) (*o*-MBA)-CdS-ZY excitation spectrum is obtained by monitoring the emission at 492 nm, and the excitation wavelength for the emission spectrum is 395 nm. (B) (*p*-MBA)-CdS-ZY excitation spectrum is obtained by monitoring the emission at 492 nm, and the excitation wavelength for the emission spectrum is 367 nm. (C) (MAA)-CdS-ZY excitation spectrum is obtained by monitoring the emission of at 485 nm, and the excitation wavelength for the emission spectrum is 367 nm.
